# Supplementary material for: Influence of the N–H functionality on activating O,N,N-titanium complexes and controlling polyethylene molecular weights and distributions
Source: Royal Society of Chemistry journal article supplement (doi:10.1039/d3qi02128a), 2023-11-24
Supplement: d3qi02128a1.pdf [file d3qi02128a1.pdf]

## Supporting Information

# Influence of N–H Functionality on Activating O,N,N-Titanium Complexes and Controlling Polyethylene Molecular Weights and Distributions

Jiliang Tian,<sup>a</sup> Zhihao Gao,<sup>a</sup> Yongxin Liu,<sup>a</sup> Pierre Braunstein,<sup>\*,b</sup> Shaofeng Liu,<sup>\*,a</sup> and  
Zhibo Li<sup>\*,a,c</sup>

<sup>a</sup> Key Laboratory of Biobased Polymer Materials, College of Polymer Science and  
Engineering, Qingdao University of Science and Technology, Qingdao, 266042, China

<sup>b</sup> Institut de Chimie (UMR 7177 CNRS), Université de Strasbourg, 4 rue Blaise Pascal,  
CS 90032, F-67081 Strasbourg Cedex, France

<sup>c</sup> College of Chemical Engineering, Qingdao University of Science and Technology,  
Qingdao, 266042, China

\*Corresponding Authors: E-mail: [shaofengliu@qust.edu.cn](mailto:shaofengliu@qust.edu.cn); [zbli@qust.edu.cn](mailto:zbli@qust.edu.cn); and  
[braunstein@unistra.fr](mailto:braunstein@unistra.fr)

|                                                                                                                                                                                                                                                                                                                                                            |     |
|------------------------------------------------------------------------------------------------------------------------------------------------------------------------------------------------------------------------------------------------------------------------------------------------------------------------------------------------------------|-----|
| <b>Figure S1.</b> $^1\text{H}$ NMR (400 MHz, in $\text{CDCl}_3$ , at 20 °C) spectrum of <b>1-TiCl<sub>3</sub></b> . .....                                                                                                                                                                                                                                  | S4  |
| <b>Figure S2.</b> $^{13}\text{C}$ NMR (100 MHz, in $\text{CDCl}_3$ , at 20 °C) spectrum of <b>1-TiCl<sub>3</sub></b> .....                                                                                                                                                                                                                                 | S4  |
| <b>Figure S3.</b> $^1\text{H}$ - $^{13}\text{C}$ HSQC (400 MHz for $^1\text{H}$ NMR and 100 MHz for $^{13}\text{C}$ NMR, in $\text{CDCl}_3$ , at 20 °C) spectrum of <b>1-TiCl<sub>3</sub></b> .....                                                                                                                                                        | S5  |
| <b>Figure S4.</b> SEC curves of polymers obtained using <b>1-TiCl<sub>3</sub></b> at different ethylene pressures (Table 1 runs 2–5). .....                                                                                                                                                                                                                | S5  |
| <b>Figure S5.</b> Stacked $^1\text{H}$ NMR (400 MHz, in $\text{C}_6\text{D}_6$ , at 20 °C) spectra of reactions of <b>1-TiCl<sub>3</sub></b> with 5 or 20 equiv of <i>d</i> -MAO in $\text{C}_6\text{D}_6$ .....                                                                                                                                           | S6  |
| <b>Figure S6.</b> Stacked $^1\text{H}$ NMR (400 MHz, in $\text{C}_6\text{D}_6$ , at 20 °C) spectra of reactions of <b>1-TiCl<sub>2</sub></b> with 5 or 20 equiv of <i>d</i> -MAO in $\text{C}_6\text{D}_6$ .....                                                                                                                                           | S6  |
| <b>Figure S7.</b> SEC curves of polymers obtained by <b>1-TiCl<sub>3</sub></b> (blue) and <b>1-TiCl<sub>2</sub></b> (red) with pre-activation by 200 equiv of <i>d</i> -MAO at 20 atm of ethylene (Table 2 runs 8 and 9) ...                                                                                                                               | S7  |
| <b>Figure S8.</b> FT-IR (4000–500 $\text{cm}^{-1}$ ) spectrum of polymer obtained in Table 1 run 2. Fourier transform infrared (FT-IR) spectrum (solid sample, 10 mg, 20 °C) was obtained on a Bruker Tensor II FT-IR spectrometer in attenuated total reflection mode at a 4 $\text{cm}^{-1}$ resolution and reported in the frequency of absorption..... | S7  |
| <b>Figure S9.</b> SEC curves of polymers obtained using <b>1-TiCl<sub>3</sub></b> with pre-activation by 200 equiv of $\text{AlEt}_3$ (black) or $\text{Al}^i\text{Bu}_3$ (red) in Table 2 runs 6 and 7. ....                                                                                                                                              | S8  |
| <b>Figure S10.</b> $^1\text{H}$ NMR (400 MHz, in $\text{CDCl}_3$ , at 20 °C) spectrum of <b>2-b</b> .....                                                                                                                                                                                                                                                  | S8  |
| <b>Figure S11.</b> $^1\text{H}$ NMR (400 MHz, in $\text{CDCl}_3$ , at 20 °C) spectrum of <b>2-c</b> .....                                                                                                                                                                                                                                                  | S9  |
| <b>Figure S12.</b> $^1\text{H}$ NMR (400 MHz, in $\text{CDCl}_3$ , at 20 °C) spectrum of <b>2-L</b> .....                                                                                                                                                                                                                                                  | S9  |
| <b>Figure S13.</b> $^{13}\text{C}$ NMR (100 MHz, in $\text{CDCl}_3$ , at 20 °C) spectrum of <b>2-L</b> .....                                                                                                                                                                                                                                               | S10 |
| <b>Figure S14.</b> $^1\text{H}$ NMR (400 MHz, in $\text{CDCl}_3$ , at 20 °C) spectrum of <b>2-TiCl<sub>3</sub></b> .....                                                                                                                                                                                                                                   | S10 |
| <b>Figure S15.</b> $^{13}\text{C}$ NMR (100 MHz, in $\text{CDCl}_3$ , at 20 °C) spectrum of <b>2-TiCl<sub>3</sub></b> .....                                                                                                                                                                                                                                | S11 |
| <b>Figure S16.</b> SEC curves of poly (ethylene- <i>co</i> -1-octene)s prepared by different Ti complexes (Table 3 runs 1–3) .....                                                                                                                                                                                                                         | S11 |
| <b>Figure S17.</b> DSC thermogram of poly(ethylene- <i>co</i> -1-octene) copolymer sample produced in Table 3 run 1 .....                                                                                                                                                                                                                                  | S12 |
| <b>Figure S18.</b> DSC thermogram of poly(ethylene- <i>co</i> -1-octene) copolymer sample produced in Table 3 run 3 .....                                                                                                                                                                                                                                  | S12 |

|                                                                                                                                                                                                                                |     |
|--------------------------------------------------------------------------------------------------------------------------------------------------------------------------------------------------------------------------------|-----|
| <b>Figure S19.</b> $^{13}\text{C}$ NMR (100 MHz, in $\text{C}_2\text{D}_2\text{Cl}_4$ , at 120 °C) spectrum of polymer obtained in Table 3 run 1 in $\text{C}_2\text{D}_2\text{Cl}_4$ at 120 °C. ....                          | S13 |
| <b>Figure S20.</b> $^{13}\text{C}$ NMR (100 MHz, in $\text{C}_2\text{D}_2\text{Cl}_4$ , at 120 °C) spectrum of polymer obtained in Table 3 run 3 in $\text{C}_2\text{D}_2\text{Cl}_4$ at 120 °C. ....                          | S13 |
| <b>Figure S21.</b> SEC curves of polymers prepared in the copolymerizations by <b>1-TiCl<sub>3</sub></b> and <b>1-TiCl<sub>2</sub></b> with pre-activation (Table 3 runs 4 and 5). ....                                        | S14 |
| <b>Figure S22.</b> DSC thermogram of polymer prepared in the copolymerization by <b>1-TiCl<sub>3</sub></b> with pre-activation (Table 3 run 4). ....                                                                           | S14 |
| <b>Figure S23.</b> DSC thermogram of polymer prepared in the copolymerization by <b>1-TiCl<sub>2</sub></b> with pre-activation (Table 3 run 5). ....                                                                           | S15 |
| <b>Figure S24.</b> $^{13}\text{C}$ NMR (100 MHz, in $\text{C}_2\text{D}_2\text{Cl}_4$ , at 120 °C) spectrum of polymer obtained in the copolymerization by <b>1-TiCl<sub>3</sub></b> with pre-activation (Table 3 run 4). .... | S15 |
| <b>Figure S25.</b> $^{13}\text{C}$ NMR (100 MHz, in $\text{C}_2\text{D}_2\text{Cl}_4$ , at 120 °C) spectrum of polymer obtained in the copolymerization by <b>1-TiCl<sub>2</sub></b> with pre-activation (Table 3 run 5). .... | S16 |
| <b>Table S1.</b> Crystal Data and Structure Refinement for Metal Complexes .....                                                                                                                                               | S17 |
| <b>Table S2.</b> Selected Bond Distances (Å) and Angles (deg) for <b>1-TiCl<sub>3</sub></b> .....                                                                                                                              | S18 |
| <b>Table S3.</b> Selected Bond Distances (Å) and Angles (deg) for <b>2-TiCl<sub>3</sub></b> .....                                                                                                                              | S18 |
| <b>Table S4.</b> Selected Bond Distances (Å) and Angles (deg) for <b>1-TiCl<sub>1.84</sub>Me<sub>0.16</sub></b> .....                                                                                                          | S19 |
| <b>Table S5.</b> Selected Bond Distances (Å) and Angles (deg) for <b>1-TiCl<sub>1.30</sub>Me<sub>0.70</sub></b> .....                                                                                                          | S19 |

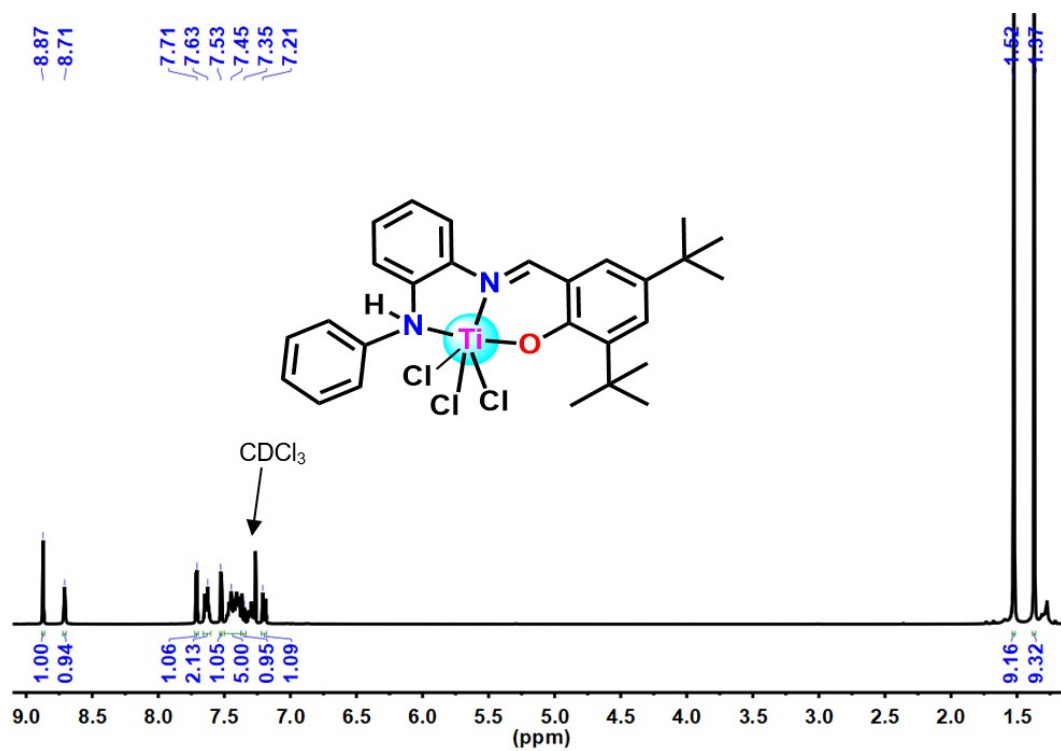

**Figure S1.** <sup>1</sup>H NMR (400 MHz, in CDCl<sub>3</sub>, at 20 °C) spectrum of **1-TiCl<sub>3</sub>**.

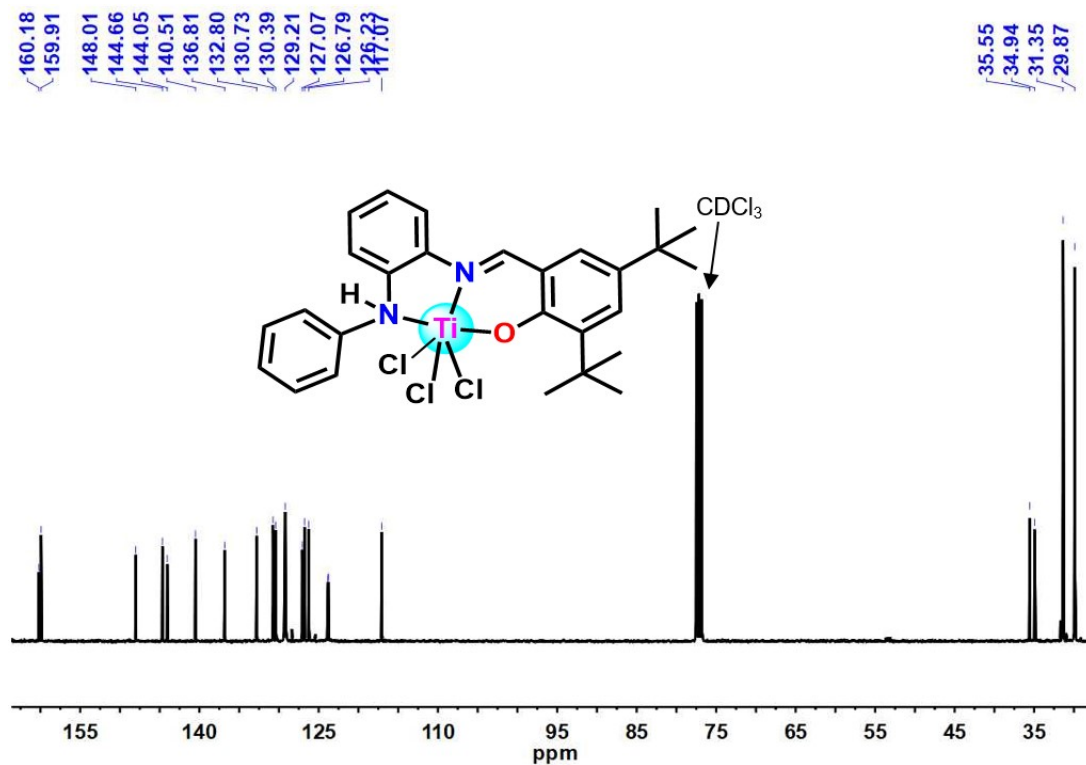

**Figure S2.** <sup>13</sup>C NMR (100 MHz, in CDCl<sub>3</sub>, at 20 °C) spectrum of **1-TiCl<sub>3</sub>**.

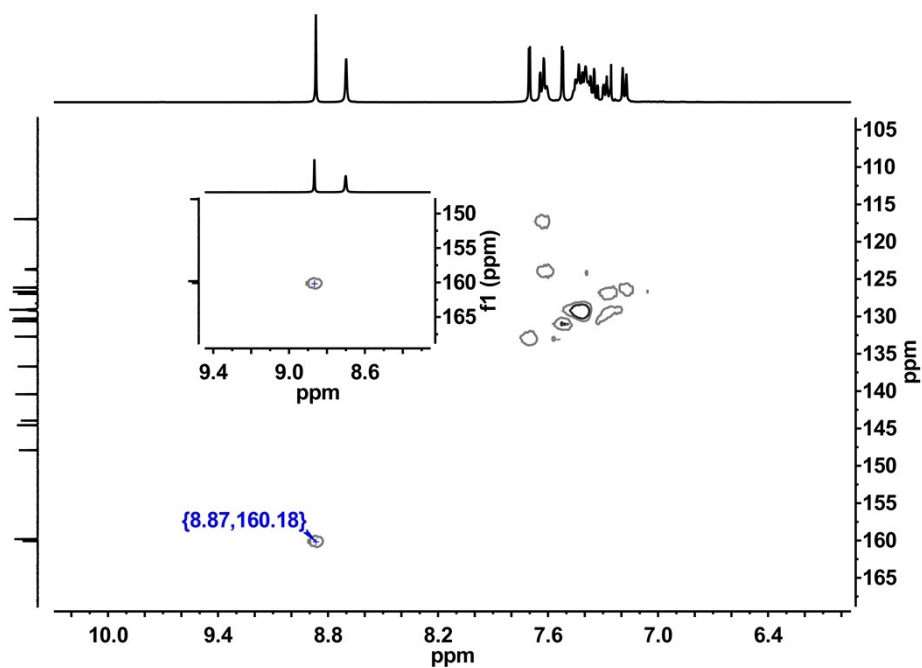

**Figure S3.**  $^1\text{H}$ - $^{13}\text{C}$  HSQC (400 MHz for  $^1\text{H}$  NMR and 100 MHz for  $^{13}\text{C}$  NMR, in  $\text{CDCl}_3$ , at 20 °C) spectrum of **1-TiCl<sub>3</sub>**.

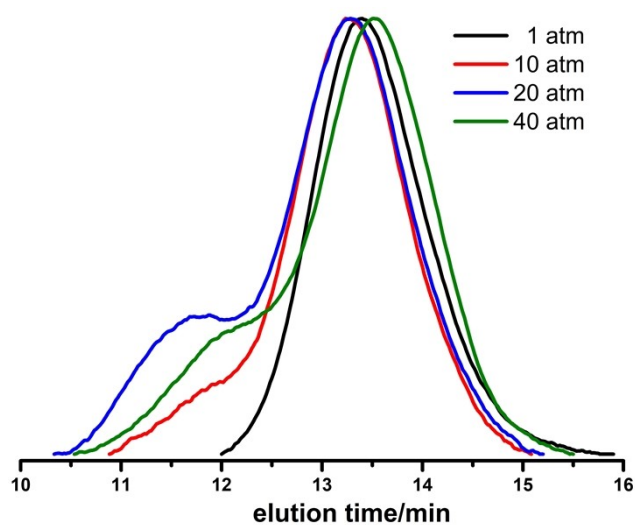

**Figure S4.** SEC curves of polymers obtained using **1-TiCl<sub>3</sub>** at different ethylene pressures (Table 1 runs 2–5).

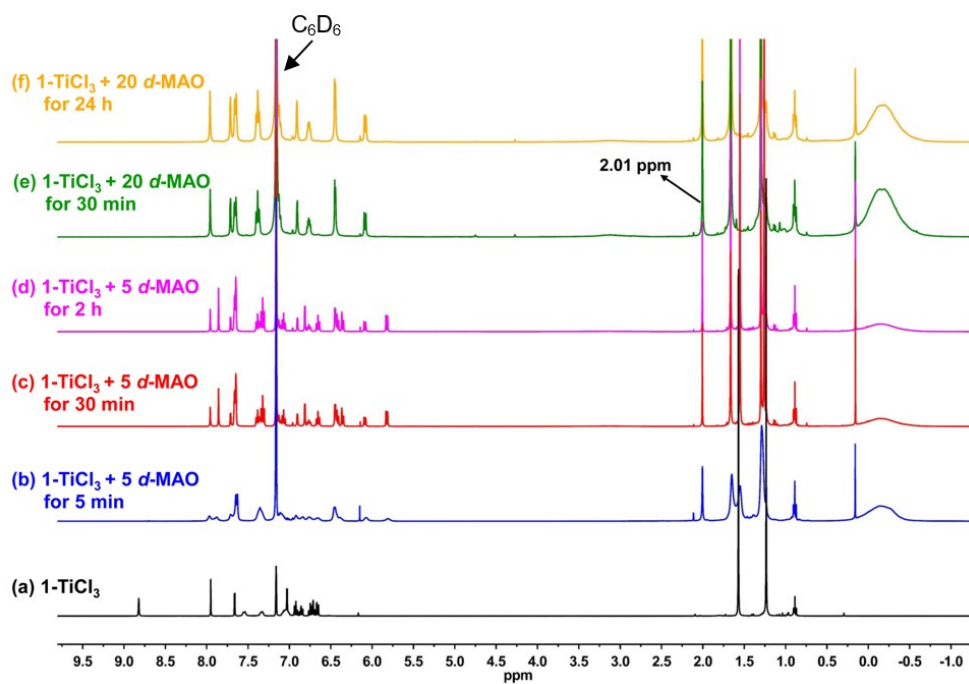

**Figure S5.** Stacked  $^1\text{H}$  NMR (400 MHz, in  $\text{C}_6\text{D}_6$ , at  $20^\circ\text{C}$ ) spectra of reactions of  $1\text{-TiCl}_3$  with 5 or 20 equiv of  $d\text{-MAO}$ .

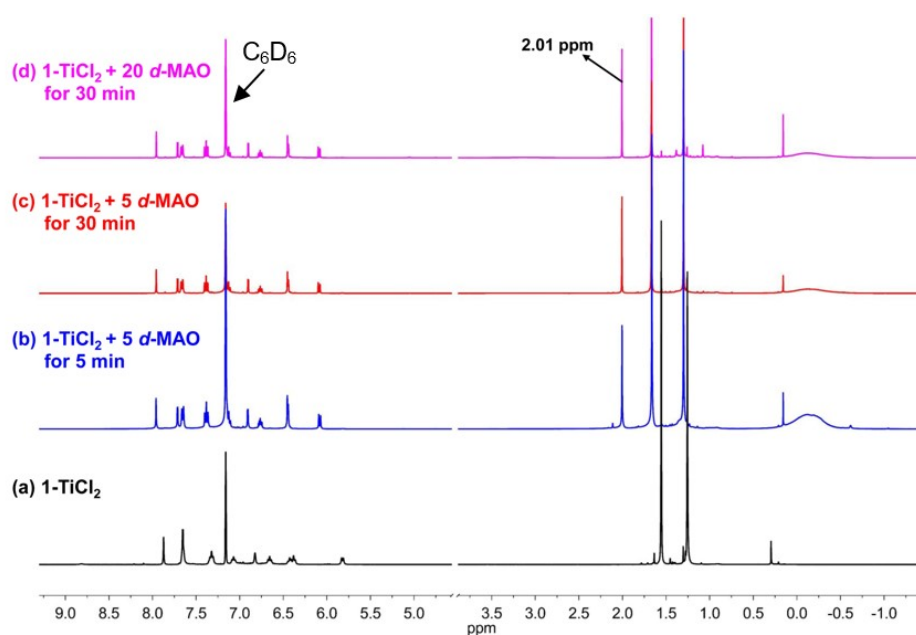

**Figure S6.** Stacked  $^1\text{H}$  NMR (400 MHz, in  $\text{C}_6\text{D}_6$ , at  $20^\circ\text{C}$ ) spectra of the reaction mixtures of  $1\text{-TiCl}_2$  with 5 or 20 equiv of  $d\text{-MAO}$ .

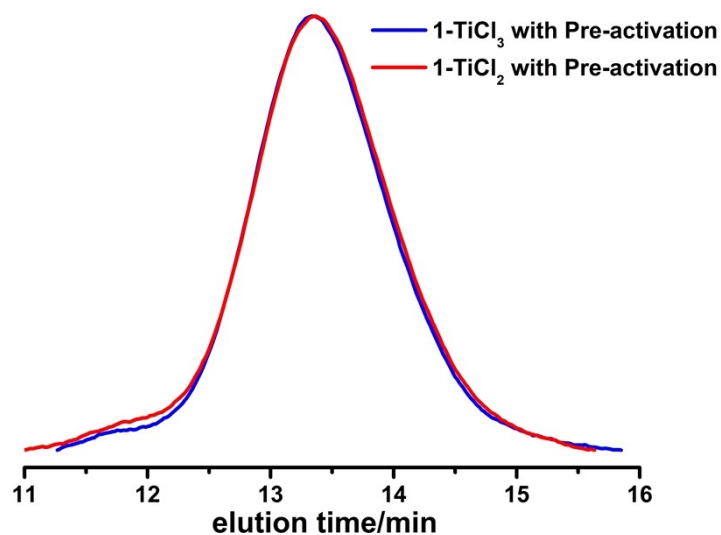

**Figure S7.** SEC curves of polymers obtained using **1-TiCl<sub>3</sub>** (blue) and **1-TiCl<sub>2</sub>** (red) with pre-activation by 200 equiv of *d*-MAO at 20 atm of ethylene (Table 2 runs 8 and 9).

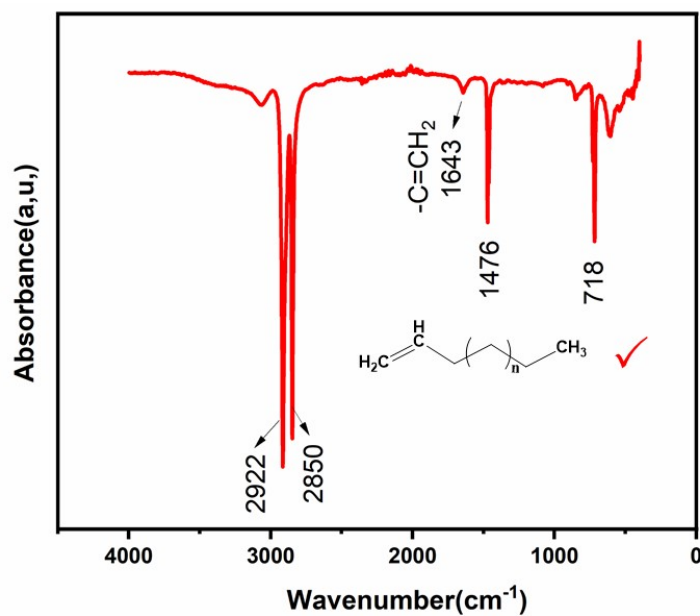

**Figure S8.** FT-IR (4000–500  $\text{cm}^{-1}$ ) spectrum of the polymer obtained in Table 1 run 2. Fourier transform infrared (FT-IR) spectrum (solid sample, 10 mg, 20 °C) was obtained on a Bruker Tensor II FT-IR spectrometer in attenuated total reflection mode at a 4  $\text{cm}^{-1}$  resolution and reported in the frequency of absorption.

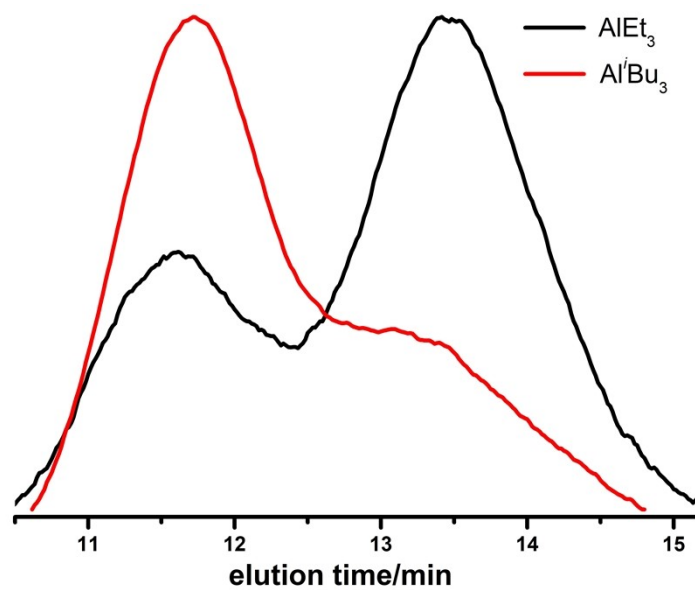

**Figure S9.** SEC curves of polymers obtained using **1-TiCl<sub>3</sub>** with pre-activation by 200 equiv of AlEt<sub>3</sub> (black) or Al<sup>*t*</sup>Bu<sub>3</sub> (red) in Table 2 runs 6 and 7.

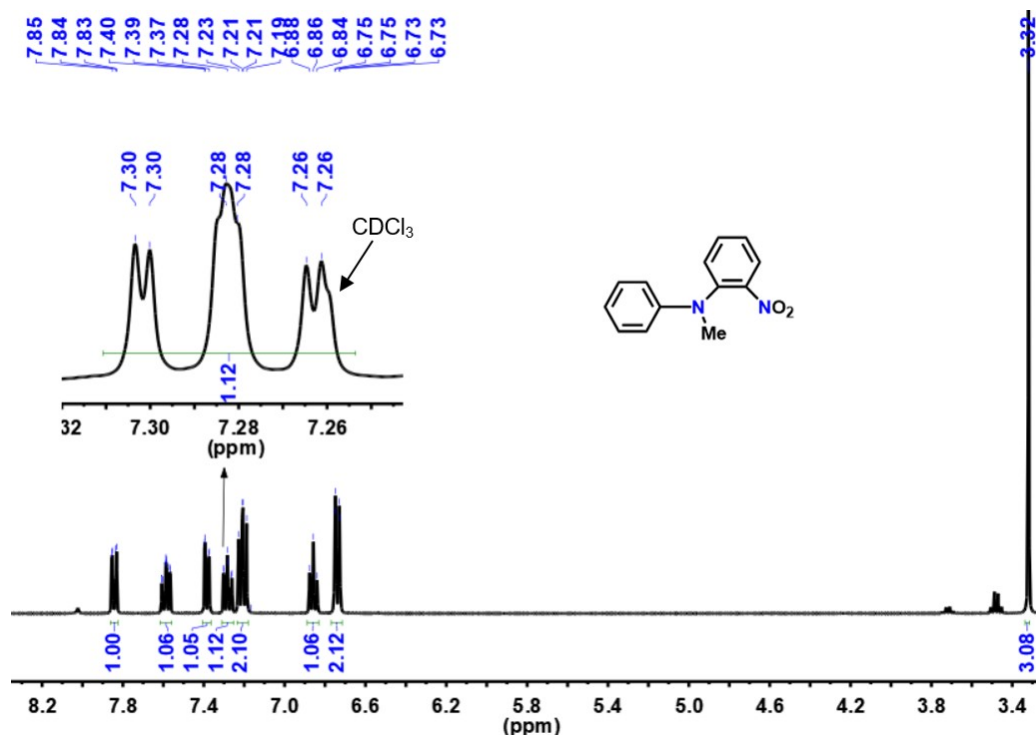

**Figure S10.** <sup>1</sup>H NMR (400 MHz, in CDCl<sub>3</sub>, at 20 °C) spectrum of **2-b**.



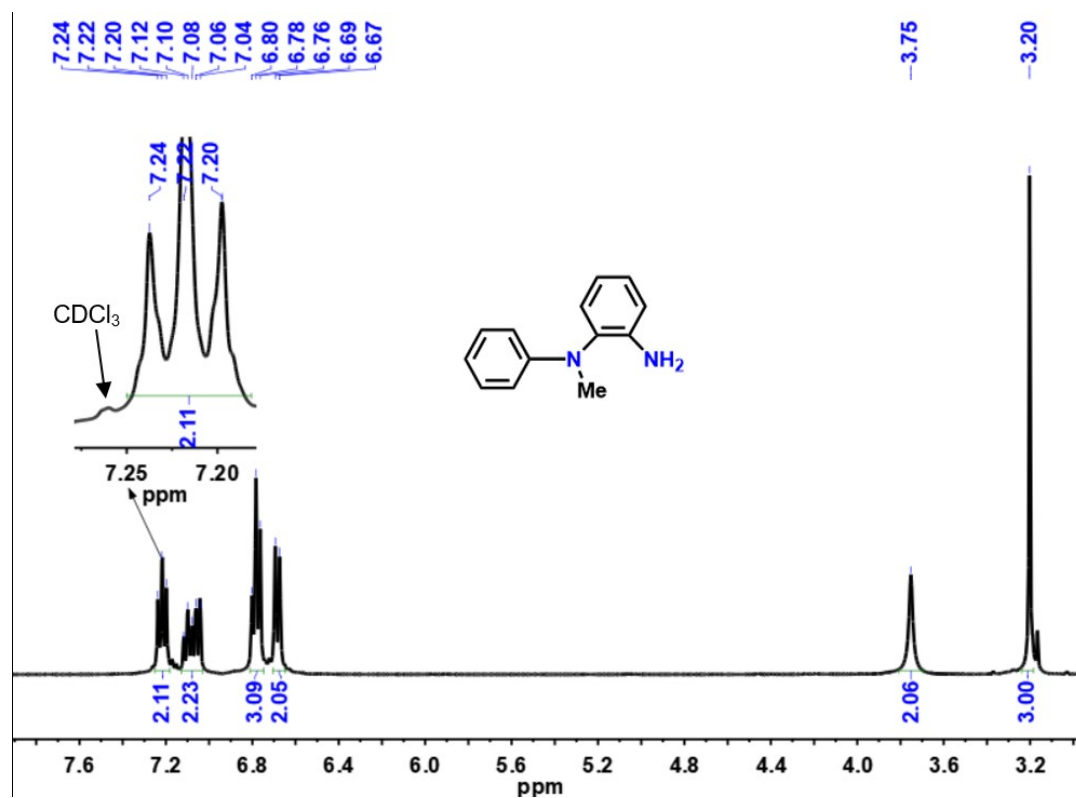

Figure S11. <sup>1</sup>H NMR (400 MHz, in CDCl<sub>3</sub>, at 20 °C) spectrum of 2-c.

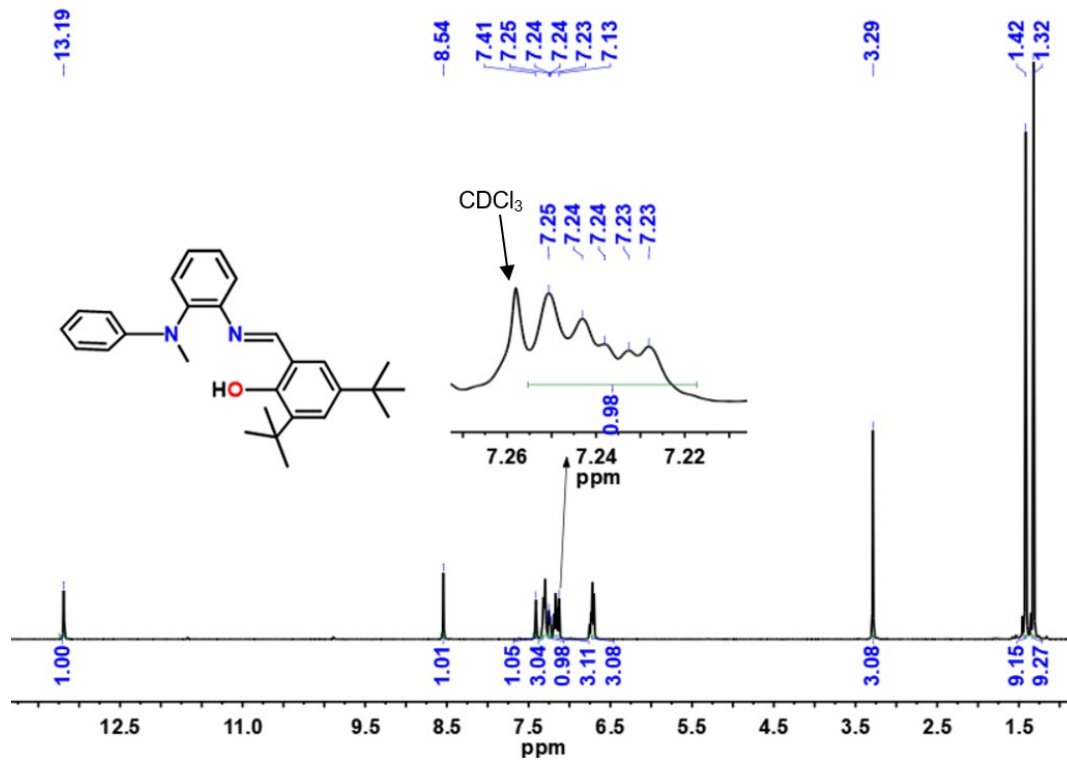

Figure S12. <sup>1</sup>H NMR (400 MHz, in CDCl<sub>3</sub>, at 20 °C) spectrum of 2-L.

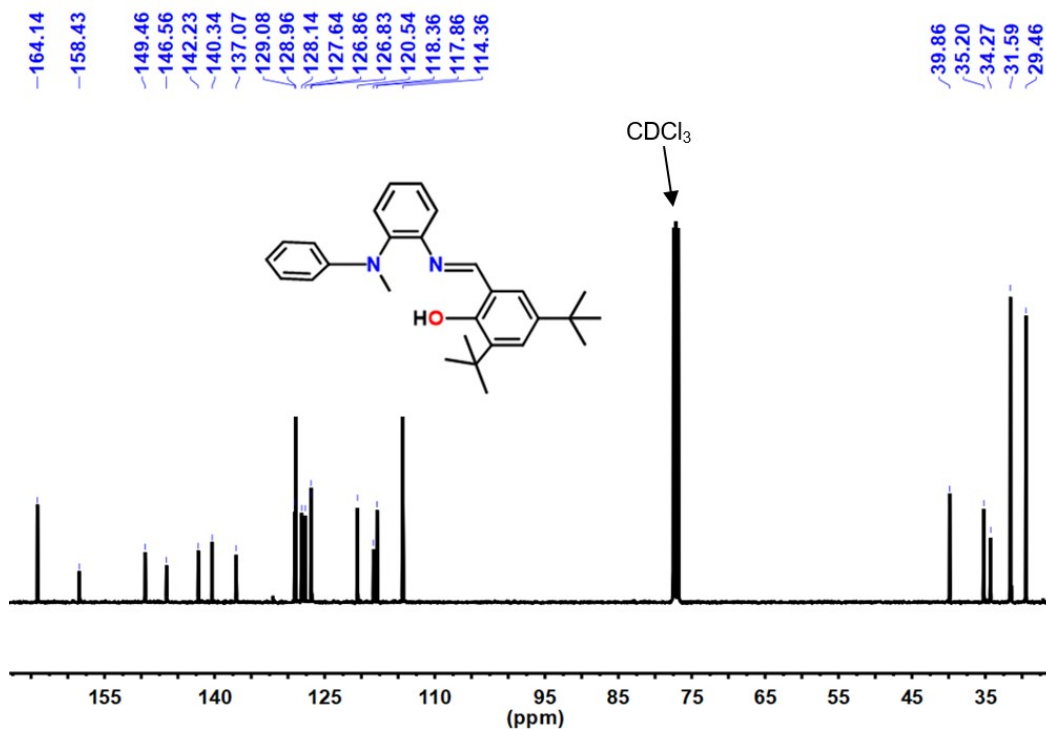

Figure S13.  $^{13}\text{C}$  NMR (100 MHz, in  $\text{CDCl}_3$ , at 20 °C) spectrum of 2-L.

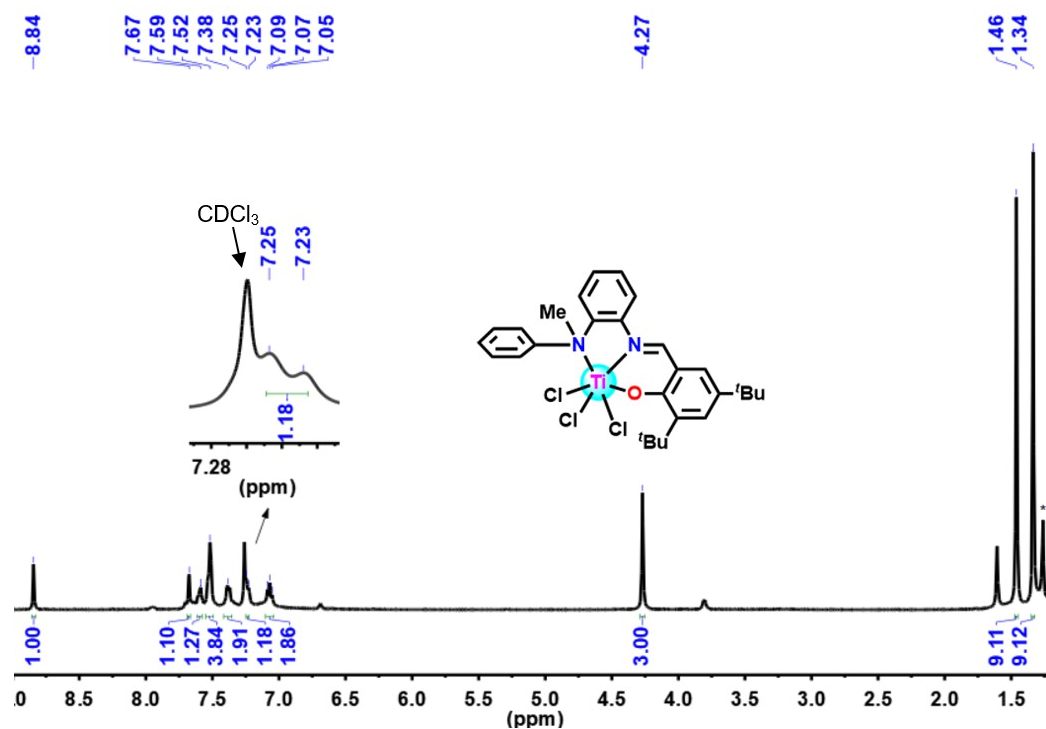

Figure S14.  $^1\text{H}$  NMR (400 MHz, in  $\text{CDCl}_3$ , at 20 °C) spectrum of 2-TiCl<sub>3</sub>.

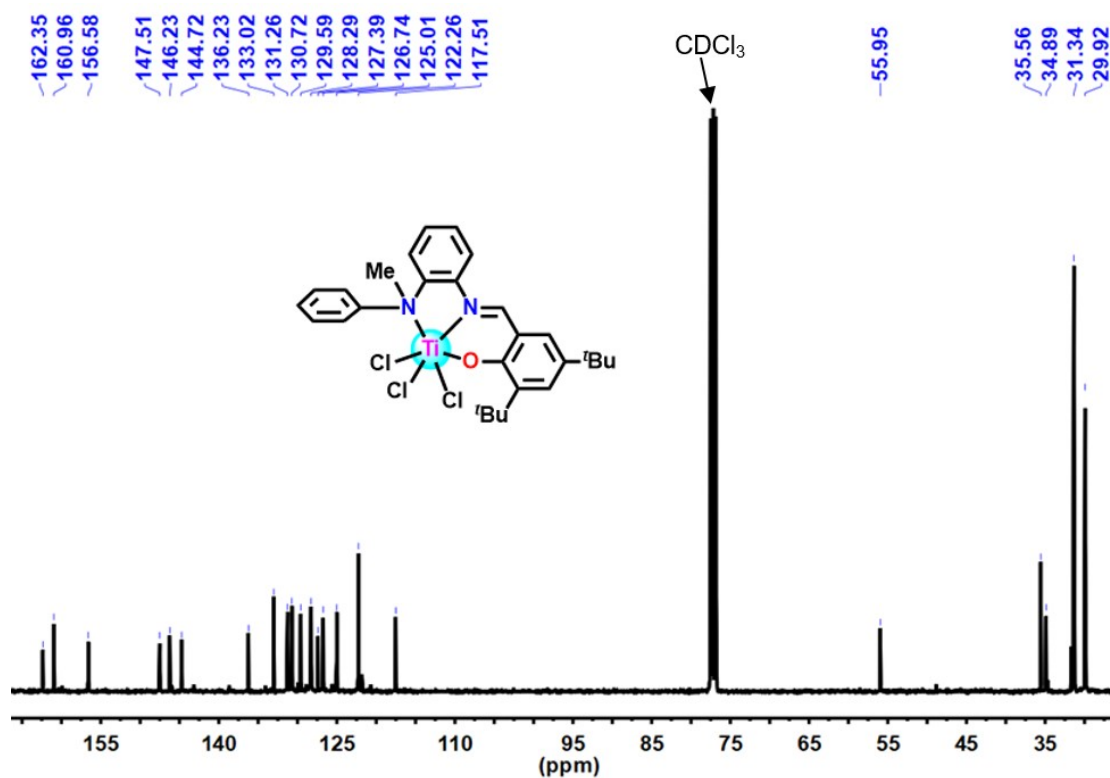

**Figure S15.**  $^{13}\text{C}$  NMR (100 MHz, in  $\text{CDCl}_3$ , at 20 °C) spectrum of **2-TiCl<sub>3</sub>**.

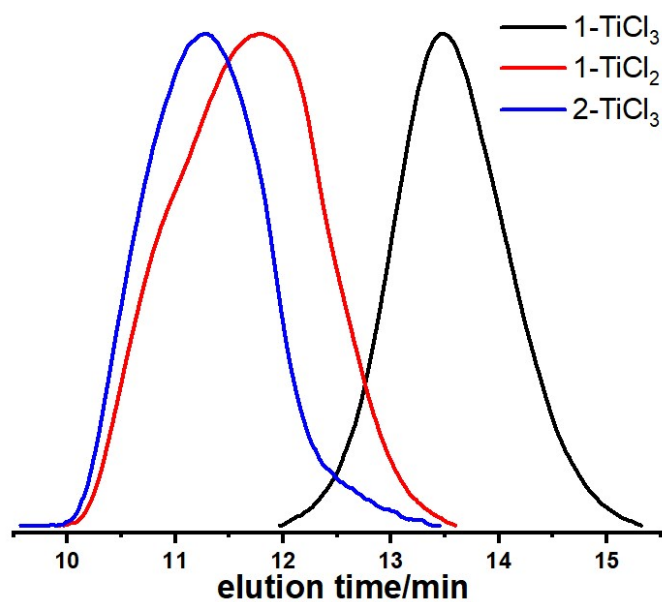

**Figure S16.** SEC curves of poly(ethylene-*co*-1-octene)s prepared using different Ti complexes (Table 3 runs 1-3).

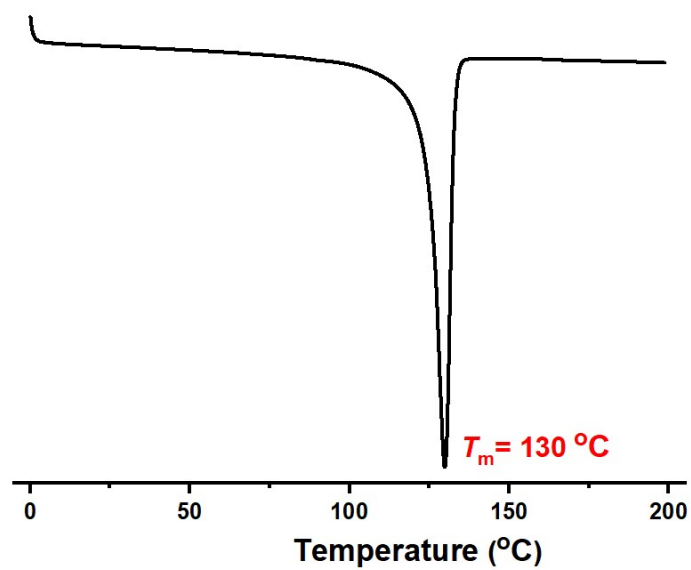

**Figure S17.** DSC thermogram of a poly(ethylene-co-1-octene) copolymer sample produced in Table 3 run 1.

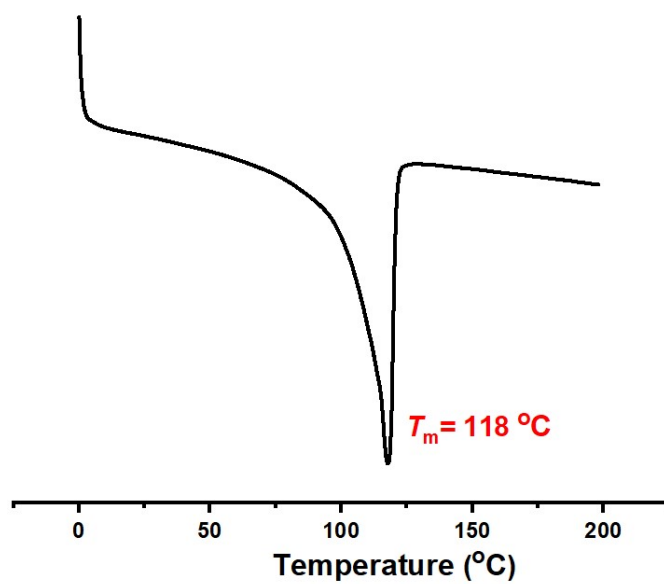

**Figure S18.** DSC thermogram of a poly(ethylene-co-1-octene) copolymer sample produced in Table 3 run 3.

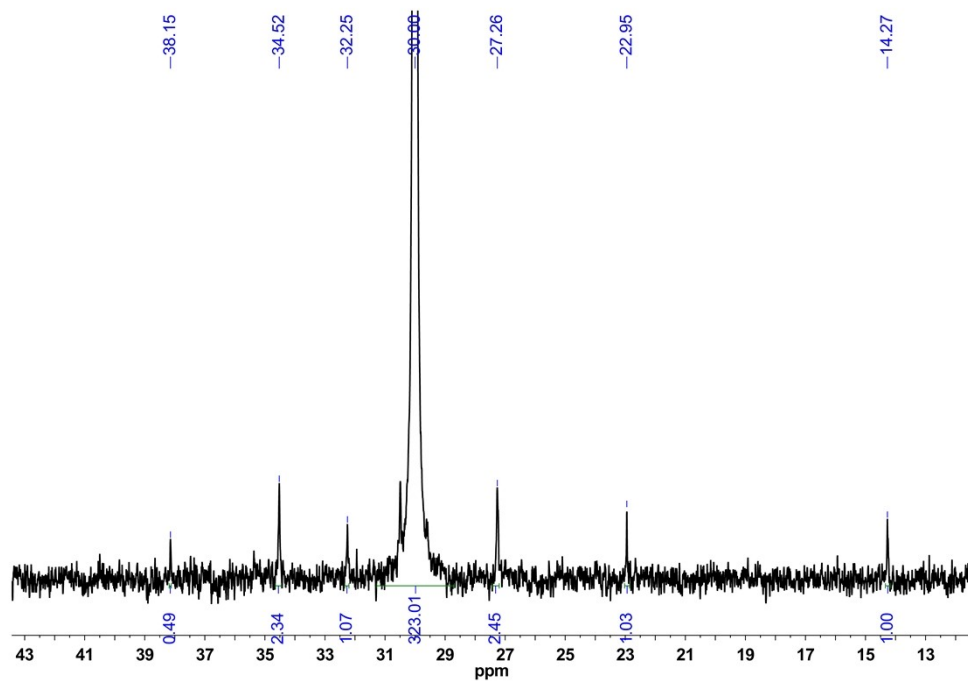

**Figure S19.**  $^{13}\text{C}$  NMR (100 MHz, in  $\text{C}_2\text{D}_2\text{Cl}_4$ , at 120  $^\circ\text{C}$ ) spectrum of the polymer obtained in Table 3 run 1.

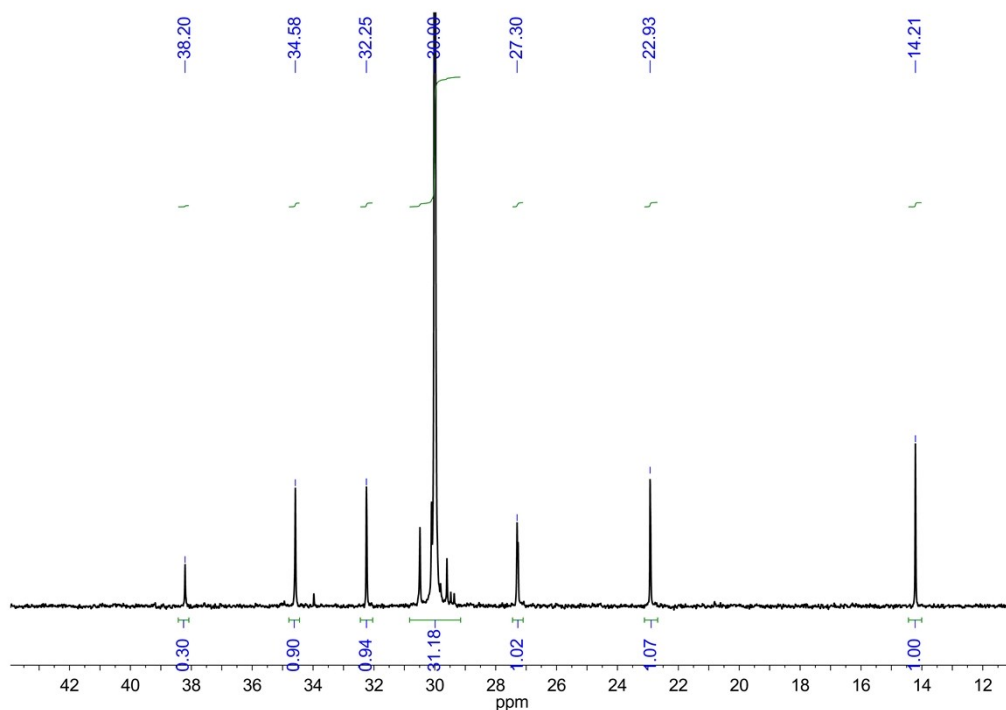

**Figure S20.**  $^{13}\text{C}$  NMR (100 MHz, in  $\text{C}_2\text{D}_2\text{Cl}_4$ , at 120  $^\circ\text{C}$ ) spectrum of the polymer obtained in Table 3 run 3.

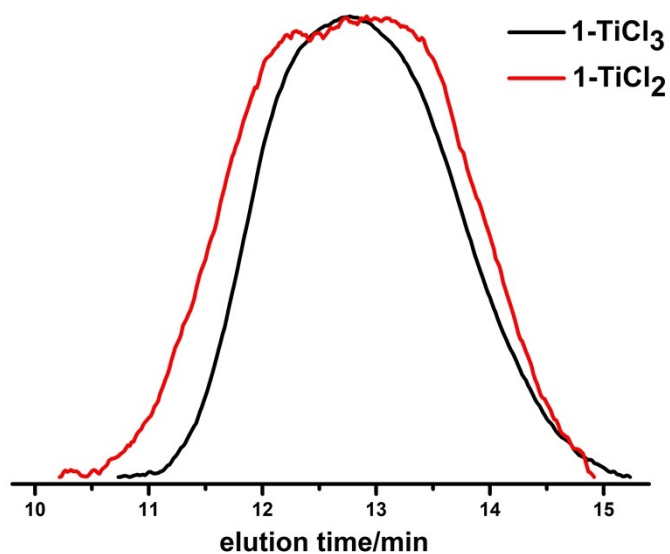

**Figure S21.** SEC curves of the polymers prepared in the copolymerizations using **1-TiCl<sub>3</sub>** and **1-TiCl<sub>2</sub>** with pre-activation (Table 3 runs 4 and 5).

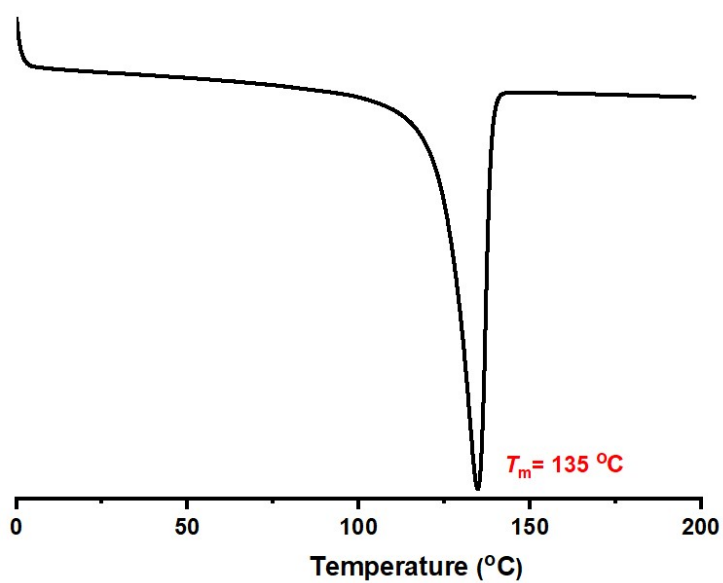

**Figure S22.** DSC thermogram of the polymer prepared in the copolymerization using **1-TiCl<sub>3</sub>** with pre-activation (Table 3 run 4).

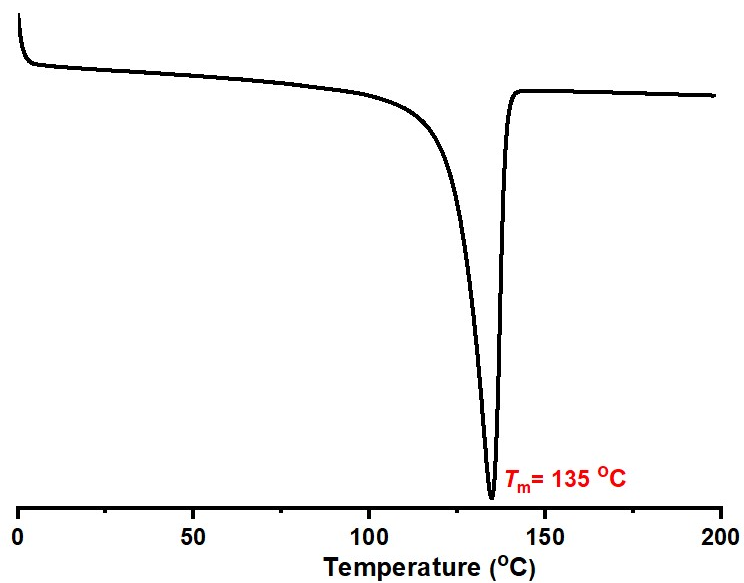

**Figure S23.** DSC thermogram of the polymer prepared in the copolymerization using **1-TiCl<sub>2</sub>** with pre-activation (Table 3 run 5).

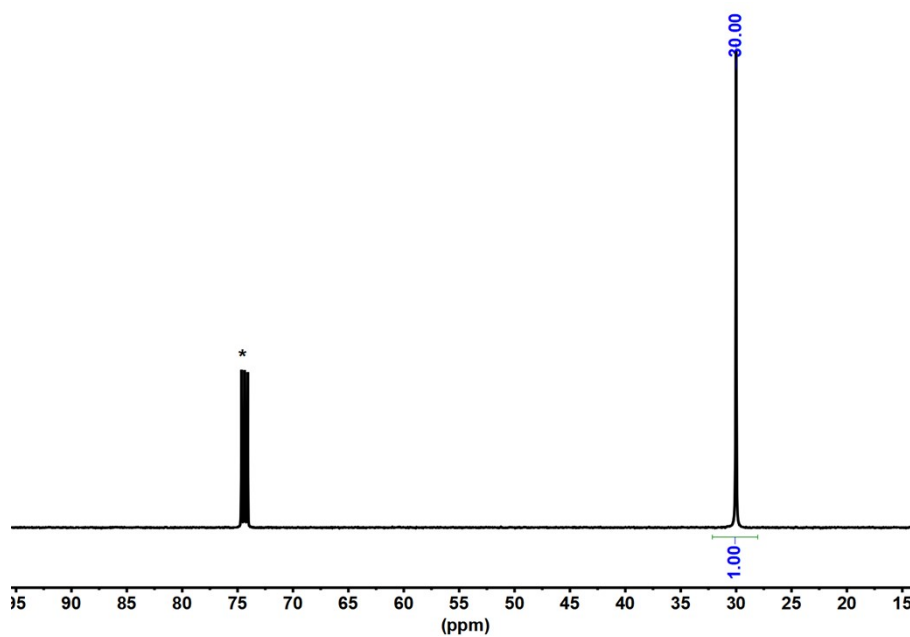

**Figure S24.** <sup>13</sup>C NMR (100 MHz, in C<sub>2</sub>D<sub>2</sub>Cl<sub>4</sub>, at 120 °C) spectrum of the polymer obtained in the copolymerization using **1-TiCl<sub>3</sub>** with pre-activation (Table 3 run 4).

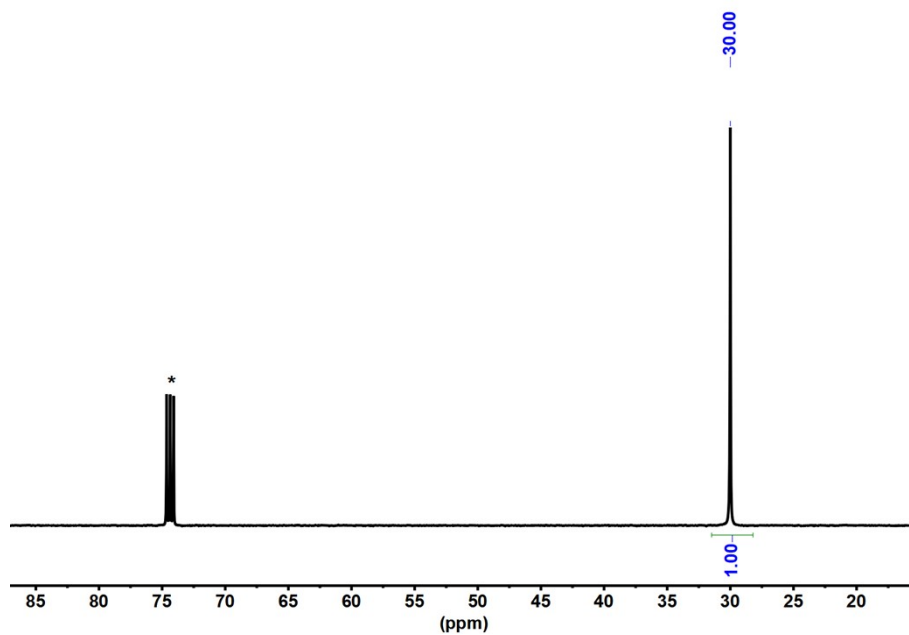

**Figure S25.**  $^{13}\text{C}$  NMR (100 MHz, in  $\text{C}_2\text{D}_2\text{Cl}_4$ , at 120 °C) spectrum of the polymer obtained in the copolymerization using **1-TiCl<sub>2</sub>** with pre-activation (Table 3 run 5).



**Table S1.** Crystal Data and Structure Refinement for Metal Complexes.

| Complex                                     | 1-TiCl <sub>3</sub>                                                | 2-TiCl <sub>3</sub>                                                | 1-TiCl <sub>1.84</sub> Me <sub>0.16</sub>                                   | 1-TiCl <sub>1.30</sub> Me <sub>0.70</sub>                                |
|---------------------------------------------|--------------------------------------------------------------------|--------------------------------------------------------------------|-----------------------------------------------------------------------------|--------------------------------------------------------------------------|
| Empirical formula                           | C <sub>27</sub> H <sub>31</sub> Cl <sub>3</sub> N <sub>2</sub> OTi | C <sub>28</sub> H <sub>33</sub> Cl <sub>3</sub> N <sub>2</sub> OTi | C <sub>27.16</sub> H <sub>30.49</sub> Cl <sub>1.84</sub> N <sub>2</sub> OTi | C <sub>27.7</sub> H <sub>32.1</sub> Cl <sub>1.3</sub> N <sub>2</sub> OTi |
| Formula weight                              | 553.79                                                             | 567.80                                                             | 513.96                                                                      | 503.04                                                                   |
| Temperature / K                             | 193.00                                                             | 193.0                                                              | 193.00                                                                      | 193.00                                                                   |
| Crystal system                              | orthorhombic                                                       | monoclinic                                                         | monoclinic                                                                  | monoclinic                                                               |
| Space group                                 | Pbca                                                               | P2 <sub>1</sub> /c                                                 | P2 <sub>1</sub> /n                                                          | P2 <sub>1</sub> /n                                                       |
| a / Å, b / Å, c / Å                         | 12.2892(6),<br>17.0825(8),<br>26.1980(13)                          | 16.1090(7),<br>37.3013(12),<br>20.2183(7)                          | 9.3489(5),<br>16.2196(7),<br>16.7518(8)                                     | 9.3909(4),<br>16.2313(7),<br>16.8292(5)                                  |
| α/°, β/°, γ/°                               | 90,<br>90,<br>90                                                   | 90,<br>112.596(2),<br>90                                           | 90,<br>93.897(2),<br>90                                                     | 90,<br>94.109(2),<br>90                                                  |
| Volume / Å <sup>3</sup>                     | 5499.8(5)                                                          | 11216.3(7)                                                         | 2534.3(2)                                                                   | 2558.62(17)                                                              |
| Z                                           | 8                                                                  | 4                                                                  | 4                                                                           | 4                                                                        |
| ρ <sub>calc</sub> / mg mm <sup>-3</sup>     | 1.338                                                              | 1.126                                                              | 1.347                                                                       | 1.306                                                                    |
| μ / mm <sup>-1</sup>                        | 3.683                                                              | 3.175                                                              | 0.554                                                                       | 2.858                                                                    |
| F(000)                                      | 2304.0                                                             | 3952.0                                                             | 1075.0                                                                      | 1058.0                                                                   |
| Crystal size / mm <sup>3</sup>              | 0.13 × 0.12 × 0.1                                                  | 0.13 × 0.12 × 0.1                                                  | 0.13 × 0.12 × 0.1                                                           | 0.13 × 0.12 × 0.1                                                        |
| Radiation / Å                               | Ga-Kα<br>(λ = 1.34139)                                             | Ga-Kα<br>(λ = 1.34139)                                             | Mo-Kα<br>(λ = 0.71073)                                                      | Ga-Kα<br>(λ = 1.34139)                                                   |
| 2θ range for data collection                | 5.87 to 114.002°                                                   | 4.606 to 107.814°                                                  | 4.854 to 54.932°                                                            | 6.59 to 120.368°                                                         |
| Index ranges                                | -15 ≤ h ≤ 15,<br>-21 ≤ k ≤ 20,<br>-32 ≤ l ≤ 32                     | -19 ≤ h ≤ 19,<br>-44 ≤ k ≤ 44,<br>-22 ≤ l ≤ 24                     | -12 ≤ h ≤ 10,<br>-21 ≤ k ≤ 20,<br>-21 ≤ l ≤ 21                              | -11 ≤ h ≤ 6,<br>-18 ≤ k ≤ 20,<br>-20 ≤ l ≤ 21                            |
| Reflections collected                       | 39965                                                              | 64768                                                              | 22960                                                                       | 19735                                                                    |
| Independent reflections                     | 5624<br>[R(int) = 0.0622]                                          | 2025<br>[R(int) = 0.0998]                                          | 5778<br>[R(int) = 0.0605]                                                   | 5589<br>[R(int) = 0.0723]                                                |
| Data/restraints/parameters                  | 5624/0/313                                                         | 20505/36/1045                                                      | 5778/0/307                                                                  | 5589/0/307                                                               |
| Goodness-of-fit on F <sup>2</sup>           | 1.036                                                              | 1.065                                                              | 1.051                                                                       | 1.019                                                                    |
| Final R indexes [I > 2σ(I)]                 | R <sub>1</sub> = 0.0370,<br>wR <sub>2</sub> = 0.0908               | R <sub>1</sub> = 0.0778,<br>wR <sub>2</sub> = 0.1796               | R <sub>1</sub> = 0.0465,<br>wR <sub>2</sub> = 0.1082                        | R <sub>1</sub> = 0.0554,<br>wR <sub>2</sub> = 0.1183                     |
| Final R indexes [all data]                  | R <sub>1</sub> = 0.0529,<br>wR <sub>2</sub> = 0.0981               | R <sub>1</sub> = 0.1688,<br>wR <sub>2</sub> = 0.2173               | R <sub>1</sub> = 0.0651,<br>wR <sub>2</sub> = 0.1203                        | R <sub>1</sub> = 0.1071,<br>wR <sub>2</sub> = 0.1417                     |
| Largest diff. peak/hole / e Å <sup>-3</sup> | 0.47 / -0.35                                                       | 0.41 / -0.66                                                       | 0.31 / -0.34                                                                | 0.40 / -0.34                                                             |

**Table S2.** Selected Bond Distances (Å) and Angles (deg) for **1-TiCl<sub>3</sub>**.

| Distances   |           |            |            |
|-------------|-----------|------------|------------|
| Ti1–Cl1     | 2.3205(6) | Ti1–O1     | 1.7883(14) |
| Ti1–Cl2     | 2.2558(6) | Ti1–N2     | 2.1743(17) |
| Ti1–Cl3     | 2.3400(7) | Ti1–N1     | 2.2922(18) |
| Angles      |           |            |            |
| Cl1–Ti1–Cl3 | 163.47(3) | O1–Ti1–N1  | 156.99(7)  |
| Cl2–Ti1–Cl1 | 93.60(2)  | N2–Ti1–Cl1 | 83.59(5)   |
| Cl2–Ti1–Cl3 | 95.03(3)  | N2–Ti1–Cl2 | 170.54(5)  |
| Cl2–Ti1–N1  | 96.58(5)  | N2–Ti1–Cl3 | 85.61(5)   |
| O1–Ti1–Cl1  | 99.88(5)  | N2–Ti1–N1  | 74.22(6)   |
| O1–Ti1–Cl2  | 105.32(5) | N1–Ti1–Cl1 | 85.45(5)   |
| O1–Ti1–Cl3  | 91.40(5)  | N1–Ti1–Cl3 | 79.58(5)   |
| O1–Ti1–N2   | 84.08(6)  |            |            |

**Table S3.** Selected Bond Distances (Å) and Angles (deg) for **2-TiCl<sub>3</sub>**.

| Distances   |            |            |            |
|-------------|------------|------------|------------|
| Ti1–Cl3     | 2.3260(19) | Ti1–O1     | 1.792(4)   |
| Ti1–Cl2     | 2.279(2)   | Ti1–N2     | 2.379(5)   |
| Ti1–Cl1     | 2.289(2)   | Ti1–N1     | 2.129(5)   |
| Angles      |            |            |            |
| Cl3–Ti1–N2  | 88.02(13)  | O1–Ti1–Cl2 | 103.19(14) |
| Cl1–Ti1–Cl3 | 170.74(9)  | O1–Ti1–N1  | 84.68(18)  |
| Cl1–Ti1–N2  | 85.78(13)  | O1–Ti1–N2  | 159.40(18) |
| Cl2–Ti1–Cl3 | 91.49(8)   | N1–Ti1–Cl3 | 83.60(13)  |
| Cl2–Ti1–Cl1 | 96.10(9)   | N1–Ti1–Cl2 | 170.66(16) |
| Cl2–Ti1–N2  | 97.22(13)  | N1–Ti1–Cl1 | 88.14(13)  |
| O1–Ti1–Cl3  | 88.68(13)  | N1–Ti1–N2  | 74.74(18)  |
| O1–Ti1–Cl1  | 94.72(13)  |            |            |

**Table S4.** Selected Bond Distances (Å) and Angles (deg) for **1-TiCl<sub>1.84</sub>Me<sub>0.16</sub>**.

| Distances   |            |             |            |
|-------------|------------|-------------|------------|
| Ti1–Cl1     | 2.2448(8)  | Ti1–N1      | 1.9468(18) |
| Ti1–Cl2     | 2.2469(7)  | Ti1–C2A     | 2.2469(7)  |
| Ti1–O1      | 1.8327(15) | Ti1–C1A     | 2.2448(8)  |
| Ti1–N2      | 2.1698(18) |             |            |
| Angles      |            |             |            |
| Cl1–Ti1–Cl2 | 108.86(3)  | N2–Ti1–C2A  | 114.78(5)  |
| O1–Ti1–Cl1  | 94.90(5)   | N2–Ti1–C1A  | 136.36(5)  |
| O1–Ti1–Cl2  | 97.37(5)   | N1–Ti1–Cl1  | 97.48(6)   |
| O1–Ti1–N2   | 80.20(7)   | N1–Ti1–Cl2  | 99.23(6)   |
| O1–Ti1–N1   | 154.81(8)  | N1–Ti1–N2   | 75.70(7)   |
| O1–Ti1–C2A  | 97.37(5)   | N1–Ti1–C2A  | 99.23(6)   |
| O1–Ti1–C1A  | 94.90(5)   | N1–Ti1–C1A  | 97.48(6)   |
| N2–Ti1–Cl1  | 136.36(5)  | C1A–Ti1–C2A | 108.86(3)  |
| N2–Ti1–Cl2  | 114.78(5)  |             |            |

**Table S5.** Selected Bond Distances (Å) and Angles (deg) for **1-TiCl<sub>1.30</sub>Me<sub>0.70</sub>**.

| Distances    |            |             |            |
|--------------|------------|-------------|------------|
| Ti1–Cl1      | 2.2539(11) | Ti1–Cl2A    | 2.2606(16) |
| Ti1–O1       | 1.835(2)   | Ti1–C2A     | 2.2606(16) |
| Ti1–N2       | 2.173(2)   | Ti1–C1A     | 2.2539(11) |
| Ti1–N1       | 1.952(2)   |             |            |
| Angles       |            |             |            |
| Cl1–Ti1–Cl2A | 106.55(5)  | N2–Ti1–C2A  | 115.02(8)  |
| O1–Ti1–Cl1   | 95.36(7)   | N2–Ti1–C1A  | 138.43(7)  |
| O1–Ti1–N2    | 80.66(9)   | N1–Ti1–Cl1  | 98.13(8)   |
| O1–Ti1–N1    | 155.78(10) | N1–Ti1–N2   | 75.89(9)   |
| O1–Ti1–Cl2A  | 96.38(8)   | N1–Ti1–Cl2A | 98.91(9)   |
| O1–Ti1–C2A   | 96.38(8)   | N1–Ti1–C2A  | 98.91(9)   |
| O1–Ti1–C1A   | 95.36(7)   | N1–Ti1–C1A  | 98.13(8)   |
| N2–Ti1–Cl1   | 138.43(7)  | C1A–Ti1–C2A | 106.55(5)  |
| N2–Ti1–Cl2A  | 115.02(8)  |             |            |
